# Supplementary material for: Blood-based biomarkers in hypothalamic-pituitary axes for the risk of dementia or cognitive decline: a systematic review and meta-analysis
Source: Aging (Albany NY). 2020 Oct 26;12(20):20350–65. doi: 10.18632/aging.103813 (PMC7655197; doi:10.18632/aging.103813)
Supplement: Supplementary Table 1 [file aging-12-103813-s001..xlsx]

## Sheet: Search
Search: (follicle stimulating hormone OR FSH OR luteinizing hormone OR LH OR lactogen OR pituitary OR sex hormone OR androgen OR testosterone OR dihydrotestosterone OR DHT OR estrogen OR estradiol OR estriol OR estrone OR progesterone OR sex hormone binding globulin OR SHBG OR corticotropin OR adrenocorticotropic hormone OR ACTH OR dehydroepiandrosterone OR DHEA OR dehydroepiandrosterone sulfate …
PubMed 1922/10/01 - 2020/02/23: 16,835 hits
PubMed 2020/01/01 - 2020/06/29: 834 hits
EMBASE 1946 - 2020/02/23: 26,815 hits
Search: hormone AND (dementia OR Alzheimer)
MEDLINE 1951 - 2020/06/29: 3,214 hits
PsycINFO 1919 - 2020/06/29: 1,419 hits
BIOSIS 1994 - 2020/06/29: 3,068 hits
Total: 52,185 hits

## Sheet: Studies
Online supplementary table 1. Characteristics of prospective studies included in the systematic review and meta-analysis
Reference	First author	Year	Study design	Cohort name	Source	Country	Mean age [SD](range), y	Female (%)	Dementia at baseline excluded	Hormone or thyroid medication users excluded	Fasting blood	Morning blood	Biomarker	Hormone measurement technique	Coefficients of variation (intra-assay, interassay)	Mean follow-up [SD](range), y	Follow-up rate	Outcome	Criteria of dementia or cogintive decline	Sample	Case	Adjusted factors	For meta-analysis			Quality score
																							RR	LCI	UCI
Hypothalamic-pituitary-thyroid (HPT) axis
[S1]	Annerbo	2006	cohort	NA	memory clinic	Sweden	65	52	yes	NA	NA	NA	TSH (across)	NA	NA	6	1	AD	DSM-IV, ICD-10 (AD)	93	32	age	0.38	0.13	0.95	6
[S2]	Annerbo	2009	cohort	the Kungsholmen Project	population	Sweden	81.0 [4.6]	75	yes	no	NA	NA	TSH (across)	NA	NA	6.7(3-9)	0.72	AD	DSM-III-R (AD)	200	61	age, sex and education	0.96	0.8	1.16	7
[S3]	Aubert	2017	cohort	Health ABC Study	population	U.S.A	75.1 [2.8]	52	yes	yes	NA	NA	TSH (L vs N)	immunoassay	4.71% 3.64%	9	0.85	dementia	Dementia was defined by any of the following criteria: (i)>= 1.5 SD race- stratified 3MS decline from Year 1 visit to last available examination; (ii) dementia as primary or secondary diagnosis of admission on hospital records with 3MS <=90 points at Year 3 or either follow- up; (iii) prescription of dementia drug recorded on the yearly drug inventory.	2026	456	age, sex, race, education level and 3MS at baseline	1.38	0.74	2.58	9
													TSH (H vs N)							2251	509		0.96	0.72	1.27
[S4]	Cappola	2015	cohort	the Cardiovascular Health Study	population	U.S.A	74.5 [5.1]	56	NA	yes	NA	NA	TSH (within)	chemiluminescent immunoassay	NA	17	<80%	dementia	The diagnosis of dementia was based on a progressive or static cognitive deficit of sufficient severity to affect the subjects’ activities of daily living , and a history of normal intellectual function before the onset of cognitive abnormalities.	1824	229	age, sex, race, initiation of thyroid meds, an age2 term, BMI, hypertension, diabetes, current smoking, any alcohol use, total cholesterol, stroke history, claudication, and apoe4 genotype APOE ε4	0.88	0.76	1.01	6
													TSH (L vs M)							NA	NA		1.13	0.7	1.81
													TSH (H vs M)							NA	NA		0.71	0.54	0.94
													free-T4							1824	229		1.02	0.96	1.09
													total-T3							1824	229		1.06	0.66	1.68
[S5]	Castellano	2013	nested case-control	NuAge, Nutrition as a determinant of successful aging: The Quebec longitudinal Study	community	Canada	75.9 [4.5] (67-84)	29	yes	no	NA	NA	TSH (within)	ELISA	4.6%, ?	3	0.97	cognitive decline	3MS score<=79 three years after baseline (cognitive decline)	62	31	education, thyroid medication use, GDS and SMAF scores	0.8	0.56	1.1	9
													total-T4		4.6%, 4.4%								1.14	0.96	1.33
													total-T3		2.5%, 2.4%								0.21	0.03	1.29
													free-T4		2.4%, 2.4%								1.07	0.96	1.17
													free-T3		1.7%, 1.7%								1.25	0.82	1.76
[S6]	Chaker	2016	cohort	the Rotterdam Study	population	Netherlands	64.9 [9.7]	57	yes	yes	NA	NA	TSH (across)	electrochemiluminescence immunoassay	NA	8	0.99	dementia	DSM-III-R (dementia)	7966	496	age, sex, cohort, hypertension, cholesterol, smoking, BMI, diabetes mellitus at baseline, highest attained education, prevalent coronary heart disease, prevalent atrial fibrillation	0.49	0.33	0.73	9
													TSH (within)							7966	496		0.66	0.52	0.85
													TSH (L vs M)							5975	395		1.27	1.07	1.5
													TSH (H vs M)							5966	330		0.84	0.62	1.13
													free-T4							7966	496		1.15	0.89	1.48
[S7]	Dejong	2006	cohort	the Rotterdam Scan Study	population	Netherlands	72.3 [7.4]	51	yes	yes	no	NA	TSH (across)	chemoluminescence assay	NA	5.5	NA	dementia, AD	DSM-III-R (dementia), NINCDS/ADRDA (AD)	1025	63	age and sex	1	0.84	1.18	6
													TSH (L vs N)							1005	60		1.13	0.51	2.52
													TSH (H vs N)							938	56		1.28	0.39	4.23
													free-T4							1025	63		0.99	0.69	1.43
													total-T3							1025	63		1	0.97	1.03
													rT3	radioimmunoassay						1025	63		1	0.99	1.01
[S8]	Dejong	2009	cohort	the Honolulu–Asia Aging Study	population	U.S.A	78.1	0	yes	no	yes	NA	TSH (across)	chemiluminescence	?, 3.8%	4.7[1.8]	0.8	dementia, AD	DSM-III-R (dementia), NINCDS/ADRDA (AD)	665	106	age, albumin, educational level, depressive symptom score, BMI, systolic and diastolic blood pressure, anti-arrhythmic and beta-blocking agent use	0.89	0.74	1.07	9
													TSH (L vs N)							665	106		1.59	0.77	3.25
													TSH (H vs N)							665	106		0.73	0.25	2.15
													total-T4		4.6%, ?					665	106		1.1	0.87	1.39
													free-T4		4.8%, ?					665	106		1.2	1.05	1.37
[S9]	Folkestad	2020	nested case-control	OPENTHYRO registry cohort	community	Denmark	63	77	yes	NA	NA	NA	TSH (L vs N)	Charlton Comorbidity Index	NA	7.3	near 100%	dementia	ICD-10 (dementia)	13445	663	Charlson Comorbidity Index	1.16	1.12	1.22	8
[S10]	Forti	2012	cohort	CSBA, the Conselice Study of Brain Ageing	population	Italy	73.3 [6.0]	53	yes	no	yes	yes	TSH (across)	chemiluminescent immunoassay	5%, 9%	3.8[0.7]	0.8	dementia and its subtypes	DSM-IV (dementia), NINCDS/ADRDA (AD), NINDS-AIREN (VD)	660	86	age, gender and education, serum cholesterol, Geriatric Depression Scale, BMI, hypertension, diabetes, history of cardiovascular disease and plasma total homocysteine	1.53	0.88	2.49	9
													TSH (H vs N)							660	86		1.36	0.81	2.16
													free-T4							660	86		1.03	0.97	1.09
[S11]	George	2019	cohort	ARIC, Atherosclerosis Risk in Communities Neurocognitive Study	community	U.S.A	57 [5.7]	56	yes	no	NA	NA	TSH (across)	sandwich immunoassay	?, <=10%	21.9	0.91	dementia	ICD-9 (dementia)	12481	2235	age, sex, race-center, APOE ε4, income, education, free-T4, BMI, smoking status, hypertension, diabetes, drinking status, high-density lipoprotein cholesterol, total cholesterol, prevalent cardiovascular disease and baseline thyroid medication use	0.83	0.61	1.12	9
													TSH (L vs N)										1.09	0.87	1.36
													TSH (H vs N)										0.9	0.73	1.11
													free-T4	competition immunoassay								age, sex, race-center, APOE ε4, income, education, TSH, BMI, smoking status, hypertension, diabetes, drinking status, high-density lipoprotein cholesterol, total cholesterol, prevalent cardiovascular disease and baseline thyroid medication use	1.29	0.98	1.71
[S12]	Hogervorst	2008	cohort	the MRC Cognitive Function and Ageing Study	population	U.K	73.6 [6.2]	51	yes	NA	NA	NA	TSH (across)	enzyme-amplified immunometric assay	NA	2	0.86	cognitive decline	a drop of at least 4 points on the MMSE at follow-up (cognitive decline)	899	457	sex, age, education, mood and baseline MMSE scores	1.1	0.94	1.25	8
													free-T4	radioimmunoassay						899	457		1.06	1.01	1.1
[S13]	Kalmijn	2000	cohort	the Rotterdam Study	population	Netherlands	68.8 [7.5]	72	yes	yes	no	NA	TSH (H vs N)	TSH Lumitest	NA	2.1	NA	dementia, AD	DSM-III-R (dementia), NINCDS/ADRDA (AD)	1730	20	age and sex,atrial fibrillation for low TSH age and sex for high TSH	0.5	0.1	3.8	5
													TSH (L vs N)							1662	24		3.5	1.2	10	6
[S14]	Moon	2014	cohort	KLoSHA study	population	Korea	72.5 [6.9]	50	yes	yes	yes	NA	TSH (within)	immunoradiometric assays	NA	5	0.5	MCI or dementia	IWG 2012 (MCI), DSM-IV (dementia)	313	54	age, education, MMSE, alanine transaminase, Korean version of the Geriatric Depression Scale	0.583	0.403	0.843	8
[S15]	Quinlan	2019	cohort	the Gothenburg MCI study	memory clinic	Sweden	65.0 [7.8]	54	yes	no	yes	yes	TSH (across)	Elecsys electrochemiluminescent immunoassay	NA	2.8[1.3](?-6)	0.76	dementia and its subtypes	Global Deterioration Scale level>= 4 (dementia), NINCDS/ADRDA (AD), NINDS-AIREN or Erkinjuntti criteria (VD)	302	82	age and gender	0.65	0.35	1.19	4
													free-T4							302	82		1.1	0.57	2.13	4
													free-T3							302	82	age, gender, education, LDL/HDL ratio, BMI, APOE ε4 genotype, hypertension, current smoking, diabetes mellitus, use of beta-blocking agents	0.59	0.3	1.16	6
[S16]	Tan	2008	cohort	FHS, the Framingham Study	community	U.S.A	71	59	yes	no	NA	NA	TSH (across)	chemiluminescence	?, 5% 11%	12.7(1-25)	0.66	dementia, AD	DSM-IV (dementia), NINCDS/ADRDA (AD)	1600	241	age, history of stroke, educational achievement, homocysteine levels, body mass index, and history of atrial fibrillation	0.91	0.57	1.46	7
													TSH (within)							1462	219		0.93	0.56	1.57
													TSH (L vs M)							NA	NA		1.58	1.12	2.22
													TSH (H vs M)							NA	NA		1.38	0.94	2.02
[S17]	Vadiveloo	2011	cohort	TEARS, The Thyroid Epidemiology, Audit, and Research Study	population	U.K	66.5[15.9]	77	NA	yes	NA	NA	TSH (L vs N)	NA	NA	5.6	NA	dementia	ICD-9 and ICD-10 (dementia)	12115	204	history of dementia, history of psychiatric, age x gender interaction	1.64	1.2	2.25	6
[S18]	Volpato	2002	cohort	the Women’s Health and Aging Study	community	U.S.A	77.2	100	yes	no	no	NA	TSH (within)	immunochemiluminometric assay	NA	3	0.84	cognitive decline	drop in MMSE score of >1 point/yr (cognitive decline)	464	95	age, race, level of education, baseline MMSE score, prevalent stroke, hypertension, diabetes, ankle-brachial index, depressive symptoms, albumin, levothyroxine use, estrogen replacement therapy	1	0.61	1.63	9
													TSH (L vs M)							NA	NA		1.12	0.54	2.35
													TSH (H vs M)							NA	NA		1.12	0.65	1.95
													total-T4	immunoassay						464	95		0.51	0.28	0.91
[S19]	Yeap	2012	cohort	HIMS, Health in Men Study	population	Australia	78.3	0	yes	yes	yes	yes	TSH (across)	Elecsys 2010 immunoanalyzer	?, 4.5% 4.2%	5.9	0.98	dementia	ICD-9 and ICD-10 (dementia)	3401	145	age, BMI, smoking, education, SMMSE, social support ,sensorial impairment, diabetes, hypertension, and cardiovascular disease	1.7	0.93	3.13	9
													TSH (within)							3401	145		0.6	0.32	1.13
													TSH (L vs M)							NA	NA		1.19	0.83	1.7
													TSH (H vs M)							NA	NA		0.71	0.35	1.47
													TSH (H vs N)							3401	145		0.82	0.47	1.43
													free-T4		?, 4.0% 5.2%					3401	145		1.88	0.95	3.69
Hypothalamic-pituitary-gonadal (HPG) axis
[S20]	Carcaillon	2014	case–cohort	3C, Three-City Study	population	France	74.5 [5.8]	0	yes	yes	yes	yes	total-T	radioimmunoassay	3.8% 4.8%, 4.8% 5.5%	3.1[1]	NA	dementia and its subtypes	DSM-IV (dementia), NINCDS/ADRDA (AD), NINDS-AIREN (VD) In this analysis, VD included both diagnoses of VD and mixed dementia	503	105	age, center, educational level, body mass index, apolipoprotein E ε4 level, MMSE score at baseline, diabetes mellitus, hypertension, hypercholesterolemia, tobacco status, history of coronary heart disease, stroke.	0.82	0.27	2.5	7
													bio-T	laboratory	7.0%, 8.5%					503	105		0.34	0.13	0.9
													total-E2	radioimmunoassay	2.8%, 5.8%					503	105		1.09	0.56	2.12
[S21]	Carcaillon	2014	case–cohort	3C, Three-City Study	population	France	75.2 [5.5]	100	yes	yes	yes	yes	total-T	radioimmunoassay	NA	4	NA	dementia, AD	DSM-IV (dementia), NINCDS/ADRDA (AD)	675	132	age and center, education, APOE e4, depressive symptoms, waist-to-hip ratio,MMSE score at baseline, hypercholesterolemia, and history of myocardial infarction and stroke	0.75	0.39	1.45	7
													total-E2	radioimmunoassay						675	132		1.1	0.39	3.13
													bio-E2	laboratory						675	132		1.26	0.46	3.4
[S22]	Chu	2010	cohort	NA	community	Hong Kong, China	72.7 [6.9]	0	yes	yes	yes	yes	bio-T	laboratory	6.36% 4%, 6.97% 7.3%	1	1	dementia, AD	DSM-IV (dementia), NINCDS/ADRDA (AD)	153	10	age, education, BMI, fasting plasma glucose, and serum HDL-C levels	0.221	0.071	0.694	7
[S23]	Ford	2018	cohort	HIMS, Health in Men Study	population	Australia	77.0 [3.6]	0	yes	yes	yes	yes	total-T	liquid chromatography-tandem mass spectrometry	<6%	10.5 (9.4–12.2)	1	dementia	ICD (dementia)	4069	499	age, baseline cognitive function, depression, BMI, hypertension, cardiovascular disease and total plasma homocysteine	0.72	0.54	0.96	8
													free-T	FTZ fomula	NA					4069	499		0.7	0.53	0.93
													DHT	liquid chromatography-tandem mass spectrometry	<13%					4069	499		0.83	0.63	1.11
													total-E2	liquid chromatography-tandem mass spectrometry	<8%					4069	499		0.69	0.53	0.91
													LH	chemiluminescent immunoassay	< 7%					4069	499		1.08	0.82	1.41
													SHBG	chemiluminescent immunoassay						4069	499		1.27	0.95	1.71
[S24]	Geerlings	2003	case–cohort	The Rotterdam Study	population	Netherlands	70.7 [9.0]	100	yes	yes	no	no	total-E2	double antibody radioimmunoassay	<18%, 14%	6.3 (0–9)	NA	dementia and its subtypes	DSM-IV (dementia), NINCDS/ADRDA (AD), NINDS-AIREN (VD)	561	76	age, education, BMI, smoking status, type of menopause, age at natural menopause, and ever use of hormonal replacement therapy	1.99	0.89	4.45	8
													bio-E2	FTS fomula	NA					410	56		1.86	0.72	4.81
							68.8[8.0]	0					total-E2	double antibody radioimmunoassay	<18%, 14%					470	53	age, education, BMI, smoking status, and alcohol intake	1.16	0.52	2.58
													bio-E2	FTS fomula	NA					309	41		0.91	0.36	2.28
[S25]	Geerlings	2006	cohort	HAAS, Honolulu-Asia Aging Study	population	U.S.A	77.4 [4.3](71-93)	0	yes	NA	yes	yes	bio-T	FTS fomula	NA	6.1 (4.4–7.8)	0.77	dementia and its subtypes	DSM-III-R and DSM-IV (dementia), NINCDS/ADRDA (AD), California Alzheimer’s Disease Diagnostic and Treatment Centers guidelines (VD)	2300	178	age, years of education, Cognitive Abilities Screening Instrument score at baseline, smoking habits, alcohol intake, body mass index, physical activity, metabolic syndrome, diabetes, and depression	1.11	0.96	1.28	8
													bio-E2	FTS fomula						2300	178		1.2	1.05	1.37
[S26]	Hogervorst	2010	cohort	the Healthy Ageing Study	population	U.K	74 [6]	0	yes	NA	NA	NA	total-T	solid-phase, two-site competitive chemiluminescent immunoassay	<15.4%, <15.4%	2	NA	cognitive decline	a drop of at least 4 points on the MMSE at follow-up (cognitive decline)	240	30	age, BMI, education, FT4, log TSH levels and baseline MMSE performance	0.3	0.09	0.94	7
													free-T	FAI fomula	NA					240	30		0.96	0.93	0.99
													SHBG	solid-phase, two-site competitive chemiluminescent immunoassay	<5%, <8%					240	30		1.02	1	1.04
[S27]	Hsu	2015	cohort	CHAMP, Concord Health and Ageing in Men Project	community	Australia	76.9 [5.5]	0	yes	NA	yes	yes	total-T	liquid chromatography-tandem mass spectrometry	?, 1.9–4.5%	5	0.64	cognitive decline	a drop of at least 3 points on the MMSE at follow-up (cognitive decline)	546	60	age, BMI, smoking status, years of education, and depression score	1.11	0.9	1.37	8
													free-T	FTZ fomula	NA					546	60		1.12	0.91	1.39
													DHT	liquid chromatography-tandem mass spectrometry	?, 3.8–7.6%					546	60		0.84	0.61	1.13
													estrone		?, 5.7–8.7%					546	60		0.81	0.64	4.25
													total-E2		?, 2.9–13.6%					546	60		1.02	0.82	1.26
													SHBG	automated immunoassay	?, 2.0–2.8%					546	60		1.01	0.8	1.26
													FSH		?, 2.7–3.0%					546	60		1.05	0.87	1.27
													LH		?, 2.1–2.2%					546	60		1.14	0.96	1.36
[S28]	Laughlin	2010	cohort	The Rancho Bernardo Study	population	U.S.A	69.0 [8.8]	100	NA	yes	yes	yes	estrone	radioimmunoassay	6%, 8%	4	0.66	cognitive decline	the tertile of greatest decline compared with less or no decline (cognitive decline)	343	103	age, education, BMI, waist to hip ratio, HDL cholesterol, and triglycerides	1.4	1.01	1.82	6
													total-E2	radioimmunoassay	7%, 7%					343	103		1.09	0.74	1.49
													bio-E2	laboratory	6%, 8%					343	103		1.42	1.03	1.82
[S29]	LeBlanc	2010	cohort	MrOS, The Osteoporotic Fractures in Men Study	population	U.S.A	73.6	0	NA	yes	yes	yes	free-T	FTS fomula	NA	4.5	0.73	cognitive decline	a drop of at least 5 points on the 3MS at follow-up (cognitive decline)	1001	NA	age groups, race, education level, self-reported health and alcohol consumption	0.94	0.82	1.07	7
													free-E2	FTS fomula						1001	NA		1.07	0.97	1.18
													SHBG	Immulite Analyzer with chemiluminescent substrate	4.4%, 6.0%					1001	NA	age groups, race, education level, self-reported health, alcohol consumption, free-T, free-E2	1.13	1.02	1.26
[S30]	Moffat	2004	cohort	BLSA, Baltimore Longitudinal Study of Aging	community	U.S.A	66.3 [10.3]	0	yes	no	yes	yes	total-T	radioimmunoassay	4.8% 3.3%, 5.7% 6.4%	19.1(4-37)	NA	dementia, AD	DSM-III-R (dementia), NINCDS/ADRDA (AD)	574	54	age, education, smoking status, BMI, diabetes, any cancer diagnoses, and hormone supplements	1.02	0.98	1.06	7
													free-T	FTI fomula	NA					574	54		1.09	0.86	1.39
													SHBG	radioimmunoassay	3.4% 1.8%, 10.8% 7.7%					574	54		1.31	0.53	3.21
[S31]	Muller	2009	cohort	NA	population	Netherlands	77.4 (73-91)	0	yes	NA	yes	yes	total-T	radioimmunoassay	8.1%, 10.5%	4	0.6	cognitive decline	a drop of at least 4 points on the MMSE at follow-up (cognitive decline)	218	44	age, BMI, cholesterol, intima media thickness, diabetes, hypertension, smoking, APOE-genotype, and socioeconomic status	1	0.7	1.3	7
													free-T	FTS fomula	NA					218	44		0.9	0.6	1.2
													estrone	radioimmunoassay	5.6%, 10.2%					218	44		1.2	0.8	1.6
													total-E2	radioimmunoassay	5.3%, 8.1%					218	44		1.4	1	2
													free-E2	FTS fomula	NA					218	44		1.4	1	1.9
[S32]	Muller	2010	cohort	WHICAP, Washington Heights-Inwood Columbia Aging Project	population	U.S.A	77.4	0	yes	no	yes	no	SHBG	solid-phase, chemiluminescent enzyme immunoassay	2.3%, 5.5%	5.2[3.1]	0.81	dementia, AD	DSM-IV (dementia), NINCDS/ADRDA (AD)	217	50	age, sex, ethnic group, education, APOE genotype, smoking, BMI, cholesterol, insulin, hypertension, diabetes	1.2	0.9	1.8	9
								100												514	96		1.3	1.1	1.7
[S33]	Ponholzer	2009	cohort	VITA , Vienna Transdanube Aging study	population	Austria	75.8 (74.9-77.6)	0	yes	yes	yes	yes	total-T	radioimmunoassay	NA	5	0.66	AD	NINCDS–ADRDA (AD)	146	36	NA	0.89	0.49	1.63	6
[S34]	Ravaglia	2007	cohort	CSBA, Conselice Study of Brain Aging	population	Italy	73.9	0	yes	yes	yes	NA	total-E2	direct chemiluminescence technology	NA	3.8[0.8]	0.92	dementia and its subtypes	DSM-IV (dementia), NINCDS/ADRDA (AD), NINDS-AIREN (VD)	376	39	age, age at menopause, education, apolipoprotein E ε4 genotype, smoking status, and body mass index, stroke, cardiovascular disease, diabetes, hyperhomocysteinemia, serum folate, serum vitamin B12 , and serum creatinine.	0.81	0.28	2.34	9
													free-T	laboratory	7%, 7%					376	39		1.4	0.72	2.73
								100					total-E2	direct chemiluminescence technology	NA					433	71		1.75	1.06	2.89
													free-T	laboratory	7%, 7%					433	71		1.18	0.55	2.53
[S35]	Suravarapu	2006	cohort	BPH, benign prostatic hyperplasia	population	U.S.A	72.7 [5.1](40-79)	0	yes	NA	NA	yes	total-T	competitive chemiluminescent immunoassay	NA	10.3	NA	dementia	DSM-IV (dementia)	128	21	age, BMI, and education	0.48	0.17	1.32	8
													bio-T	laboratory						128	21		0.82	0.26	2.62
[S36]	Yaffe	2000	case–cohort	SOF, The Study of Osteoporotic Fractures	population	U.S.A	71.4	100	yes	yes	yes	yes	total-T	radioimmunoassay	6–14%	6	0.69	cognitive decline	a drop of at least 3 points on the 3MS at follow-up (cognitive decline)	292	37	age, education, BMI, current oestrogen use, surgical menopause, and baseline 3MS score	1.2	0.5	2.3	8
													free-T	laboratory	5.0–5.4%					292	37		1.4	0.6	2.7
													bio-E2		3–4%					292	37		0.3	0.1	1
													free-E2		3–4%					292	37		0.3	0.1	0.9
[S37]	Yaffe	2007	cohort	Health ABC study	community	U.S.A	75.4	0	NA	yes	NA	NA	bio-E2	laboratory	7.6%, 17%	2	0.93	cognitive decline	≥ 1.0 S.D. of change on the 3MS at follow-up (cognitive decline)	403	52	race, age, education, baseline cognitive score and study site	0.53	0.26	1.05	7
							75.2	100												333	58	race, age, education, baseline cognitive score and study site, baseline weight and hypertension.	0.38	0.21	0.7
Hypothalamic-pituitary-adrenal (HPA) axis
[S38]	Kalmijn	1998	cohort	The Rotterdam Study	population	Netherlands	67.1 [5.7](55-80)	50	yes	NA	yes	yes	DHEAS	using immobilized antibodies against the respective steroids and radioiodinated tracers	< 6.0%	1.9 [0.23]	0.89	cognitive decline	drop in MMSE score of >1 point/yr (cognitive decline)	169	40	age, sex, education, symptoms of depression, baseline MMSE score	0.7	0.5	1.1	7
[S39]	Paulsen	2019	cohort	EHLS, Epidemiology of Hearing Loss Study	population	U.S.A	66.9 [8.6]	59	yes	NA	NA	NA	aldosterone	chemiluminescent immunoassay	0.052	5	0.49	MCI or dementia	MCI was defined by impairment, based on published normative data, in 1 of the 3 tested cognitive domains (executive function, memory, verbal fluency), and reported participant memory concerns. Dementia was defined by a measured impairment in at least 2 of 3 tested cognitive domains and reported interference in ability to do day-today activities due to memory problems.	970	76	age, sex, education	0.76	0.37	1.59	7
[S33]	Ponholzer	2009	cohort	VITA , Vienna Transdanube Aging study	population	Austria	75.8 (74.9-77.6)	0	yes	yes	yes	yes	DHEAS	radioimmunoassay	NA	5	0.66	AD	NINCDS–ADRDA (AD)	146	36	NA	0.68	0.38	1.22	6
[S40]	Schrijvers	2011	cohort	The Rotterdam Study	population	Netherlands	72.0 [6.8]	58	yes	yes	yes	yes	cortisol	luminescence immunoassay	<6%, <6%	7.1(0.1-9.6)	0.76	dementia, AD	DSM-III-R (dementia), NINCDS/ADRDA (AD)	3341	243	age and gender, education, time of blood sampling, depressive symptoms, waist circumference, systolic and diastolic blood pressure, serum glucose, HDL cholesterol and current smoking status	1	0.87	1.15	8
Hypothalamic-pituitary-somatic (HPS) axis
[S41]	Almeida	2017	cohort	HIMS, Health in Men Study	population	Australia	76.9[3.6]	0	yes	NA	NA	yes	total IGF-I	commercial reagent kit	12.2% 8.6%	9.2[3.4] (0.1–13.6)	0.64	dementia	ICD-9 and ICD-10 (dementia)	3432	571	age, smoking group, history of diabetes, coronary heart disease and stroke, and BMI	1.13	0.86	1.47	7
													IGFBP-3		16.8% 4.4%					3432	571		0.71	0.54	0.93
[S42]	Dik	2003	cohort	LASA, Longitudinal Aging Study Amsterdam	population	Netherlands	75.5	51	NA	NA	no	yes	total IGF-I	Immunoradiometricassay	<4%, <14%	3	0.78	cognitive decline	the Edwards–Nunnally method (cognitive decline)	1022	296	age, sex, education, BMI, albumin, no. of chronic diseases, no. of functional limitations, physical activity, depressive symptoms.	0.63	0.33	1.19	7
[S43]	Green	2014	cohort	CaPS, The Caerphilly Prospective Study	population	U.K	56.1 [4.3](47–67)	0	yes	NA	yes	yes	total IGF-I	in-house double-antibody radio immunoassay	7.0%, 8.8%	17	0.8	dementia	NINCDS-ADRDA or NINDS-AIREN (dementia)	745	73	age, IGF batch, social class, alcohol, serum triglyceride, total cholesterol/HDL ratio, smoking, dietary intake, BMI, vitamin B12, stroke, thyroid disease, hypertension and diabetes	1.1	0.81	1.47	8
													bio IGF-I	total IGF-I/IGFBP-3	NA					745	73		1.17	0.83	1.61
													total IGF-II	in-house double-antibody radio immunoassay	7.9%, 9.7%					745	73		1.14	0.83	1.54
													IGFBP-3	in-house double-antibody radio immunoassay	5.6%, 8.8%					745	73		1.06	0.75	1.49
[S44]	Kalmijn	2000	cohort	The Rotterdam Study	population	Netherlands	67.4[5.6]	50	yes	NA	yes	yes	total IGF-I	radioimmunoassay	6.1%, 9.9%	1.9	0.89	cognitive decline	drop in MMSE score of >1 point/yr (cognitive decline)	166	37	age, sex, education, BMI, and fasting insulin levels, DHEAS, self-reported health	0.66	0.45	0.97	8
													bio IGF-I	total IGF-I/IGFBP-3	NA					166	37		0.59	0.39	0.88
													free IGF-I	two-site immunoradiometricassay	10.3%, 10.7%					166	37		1.01	0.69	1.48
													IGFBP-1	immunoradiometric assay	4.0%, 6.7%					166	37		0.92	0.61	1.37
													IGFBP-3	immunoradiometric assay	1.8%, 1.9%					166	37		1.31	0.87	1.99
[S45]	McGrath	2019	cohort	Framingham Heart Study Offspring cohort	community	U.S.A	68.7 [5.7]	53	yes	NA	yes	yes	IGFBP-2	modified ELISA sandwich approach	2.8%-6.0%, 8.7%-10.2%	11.8	0.69	dementia, AD	DSM-IV (dementia), NINCDS/ADRDA (AD)	1596	131	age, sex, education, systolic blood pressure, use of antihypertensive medication, prevalent cardiovascular disease, prevalent diabetes mellitus, ApoE4 carrier status, BMI	2.89	1.63	5.13	8
[S39]	Paulsen	2019	cohort	EHLS, Epidemiology of Hearing Loss Study	population	U.S.A	66.9 [8.6]	59	yes	NA	NA	NA	total IGF-I	quantitative sandwich enzyme immunoassay	0.068	5	0.49	MCI or dementia	MCI was defined by impairment, based on published normative data, in 1 of the 3 tested cognitive domains (executive function, memory, verbal fluency), and reported participant memory concerns. Dementia was defined by a measured impairment in at least 2 of 3 tested cognitive domains and reported interference in ability to do day-today activities due to memory problems.	970	76	age, sex, education	0.58	0.27	1.27	7
[S46]	Quinlan	2017	cohort	The Gothenburg MCI study	memory clinic	Sweden	64.6 [7.8]	57	yes	NA	yes	yes	total IGF-I	chemiluminescent immunometric assay	NA	3.6	0.78	dementia and its subtypes	The diagnosis of dementia was based on a progressive or static cognitive deficit of sufficient severity to affect the subjects’ activities of daily living , and a history of normal intellectual function before the onset of cognitive abnormalities. AD was diagnosed according to the NINCDS-ADRDA criteria. VD was diagnosed according to the NINDS-AIREN or Erkinjuntti criteria. Patients developing mix…	342	95	age, gender, education, BMI, LDL-cholesterol, current smoking, hypertension, diabetes mellitus, and APOE ε4 genotype	1	0.45	2.22	6
[S47]	Westwood	2014	cohort	FHS, the Framingham Study	community	U.S.A	65.0 [11.1]	57	yes	NA	no	no	total IGF-I	radioimmunoassay;standard immunoassay; ELISA	<4%, 4.5%	7.4[3.1]	0.84	dementia, AD	DSM-IV (dementia), NINCDS/ADRDA (AD)	3582	279	age, sex	0.7	0.5	0.97	7
[S48]	Zhang	2020	cohort	The LonGenity cohort	community	U.S.A	76.1 [6.8]	55	yes	NA	yes	yes	total IGF-I	liquid chromatography/mass spectrometry	3.3% 3.1% 2.8% 5%, ?	6.9	0.86	multiple-domain cognitive impairment	Multiple-domain cognitive impairment assignment was made when participants had impaired performance on at least one measure of memory and impaired performance on at least one measure in another cognitive domain.Performances 1.5 SD below the age-appropriate mean were defined as impaired.	598	34	age, sex	1.56	1.08	2.26	6
													bio IGF-I	total IGF-I/IGFBP-3	NA					590	34		1.3	0.92	1.84
													IGFBP-1	radioimmunoassay	9.3% 10.1% 8.5%, ?					568	35		1.02	0.72	1.45
													IGFBP-3	chemiluminescent immuno-metric assay	5.1% 6.1% 6.5%, ?					655	37		1.06	0.76	1.47

## Sheet: Quality
Online supplementary table 2. Newcastle-Ottawa Scale of prospective studies included in the meta-analysis and systematic review
Study	Selection			Comparability		Outcome			Quality score
	Representativeness of the exposed cohort	Selection of the non-exposed cohort	Ascertainment of exposure	Demenstration that outcome of interst was not present at start of study	Comparability of cohorts on the basis of the design or analysis	Assessment of outcome	Was follow-up long enough for outcomes to occur (mean follow-up)	Adequacy of follow up of cohorts
Hypothalamic-pituitary-thyroid (HPT) axis
Annerbo, 2006	- (MCI)	★	★	★	--	★	★(6)	★(100%)	6
Annerbo, 2009	★	★	★	★	★-	★	★(6.7)	- (72%)	7
Aubert, 2017	★	★	★	★	★★	★	★(9)	★(85%)	9
Cappola, 2015	★	★	★	-	-★	★	★(17)	- (<80%)	6
Castellano, 2013	★	★	★	★	★★	★	★(3)	★(97%)	9
Chaker, 2016	★	★	★	★	★★	★	★(8)	★(99%)	9
George, 2019	★	★	★	★	★★	★	★(21.9)	★(91%)	9
Kalmijn, 2000	★	★	★	★	-★ for low TSH -- for high TSH	★	- (2.1)	- (NA)	6 for low TSH 5 for high TSH
Dejong, 2006	★	★	★	★	--	★	★(5.5)	- (NA)	6
Dejong, 2009	★	★	★	★	★★	★	★(4.7)	★(80%)	9
Folkestad, 2020	★	★	★	★	-★	★	★(7.3)	★(near 100%)	8
Forti, 2012	★	★	★	★	★★	★	★(3.8)	★(80%)	9
Hogervorst, 2008	★	★	★	★	★★	★	- (2)	★(86%)	8
Moon, 2014	★	★	★	★	★★	★	★(5)	- (50%)	8
Quinlan, 2019	- (MCI)	★	★	★	--; for T3, ★★	★	- (2.8)	- (76%)	4 ;for T3, 6
Tan, 2008	★	★	★	★	-★	★	★(12.7)	- (66%)	7
Vadiveloo, 2011	★	★	★	-	-★	★	★(5.6)	- (NA)	6
Volpato, 2002	★	★	★	★	★★	★	★(3)	★(84%)	9
Yeap, 2012	★	★	★	★	★★	★	★(5.9)	★(98%)	9
Hypothalamic-pituitary-gonadal (HPG) axis
Carcaillon, 2014	- (volunteers)	★	★	★	★★	★	★(3)	- (NA)	7
Carcaillon, 2014	- (volunteers)	★	★	★	★★	★	★(4)	- (NA)	7
Chu, 2010	- (from social centers for elderly people)	★	★	★	★★	★	- (1)	★(100%)	7
Ford, 2018	★	★	★	★	-★	★	★(10.5)	★(100%)	8
Geerlings, 2003	★	★	★	★	★★	★	★(6.3)	- (NA)	8
Geerlings, 2006	★	★	★	★	★★	★	★(6.1)	- (77%)	8
Hogervorst, 2010	★	★	★	★	★★	★	- (2)	- (NA)	7
Hsu, 2015	★	★	★	★	★★	★	★(5)	- (28-64%)	8
Laughlin, 2010	★	★	★	-	★★	★	- (4)	- (66%)	6
LeBlanc, 2010	★	★	★	-	★★	★	★(4.5)	- (72-73%)	7
Moffat, 2004	- (volunteers)	★	★	★	★★	★	★(19.1)	- (NA)	7
Muller, 2009	★	★	★	★	-★	★	★(4)	- (60%)	7
Muller, 2010	★	★	★	★	★★	★	★(5.2)	★(81%)	9
Ponholzer, 2009	★	★	★	★	--	★	★(5)	- (66%)	6
Ravaglia, 2007	★	★	★	★	★★	★	★(3.8)	★(92%)	9
Suravarapu, 2006	★	★	★	★	-★	★	★(10.3)	- (NA)	8
Yaffe, 2000	★	★	★	★	★★	★	★(6)	- (69%)	8
Yaffe, 2007	★	★	★	-	★★	★	- (2)	★(93%)	7
Hypothalamic-pituitary-adrenal (HPA) axis
Kalmijn, 1998	★	★	★	★	★★	★	- (1.9)	★(89%)	8
Paulsen, 2019	★	★	★	★	★-	★	★(5)	- (49%)	7
Ponholzer, 2009	★	★	★	★	--	★	★(5)	- (66%)	6
Schrijvers, 2011	★	★	★	★	★★	★	★(7.1)	- (76%)	8
Hypothalamic-pituitary-somatic (HPS) axis
Almeida, 2017	★	★	★	★	-★	★	★(9.2)	- (64%)	7
Dik, 2003	★	★	★	-	★★	★	★(3)	- (78%)	7
Green, 2014	★	★	★	★	-★	★	★(17)	★(80%)	8
Kalmijn, 2000	★	★	★	★	★★	★	- (1.9)	★(89%)	8
McGrath, 2019	★	★	★	★	★★	★	★(11.8)	- (69%)	8
Paulsen, 2019	★	★	★	★	★-	★	★(5)	- (49%)	7
Quinlan, 2017	- (MCI)	★	★	★	★★	★	- (3.6)	- (78%)	6
Westwood, 2014	★	★	★	★	--	★	★(7.4)	★(84%)	7
Zhang, 2020	- (half of the cohort has a parental history of exceptional longevity)	★	★	★	--	★	★(6.9)	★(86%)	6
					We herein selected "age sex, and education" as the most important adjusting factors		If mean age at baseline is above 70, a mean follow-up duration of at least 3 years was predefined as long enough; if not, 5 or more years is required.	It was regarded as adequate when the follow-up rate was at least 80%

## Sheet: Keys
Abbreviations		3MS, Modified Mini-Mental State Examination; ACTH, adrenocorticotropic hormone; AD, Alzheimer’s disease; bio, bioavailable; BMI, body mass index; CBG, corticosteroid-binding globulin; CRH, corticotropin-releasing hormone; DHEAS, dehydroepiandrosterone sulfate; DHT, dihydrotestosterone; DSM, The Diagnostic and Statistical Manual of Mental Disorders; E2,estradiol; ELISA, Enzyme-linked immunosorbent…
Fomulas		Bio or free fractions of testosterone and estradiol can be mesured directly with a laboratory method or estimated using different fomulas. Related Fomulas in our study are: FTI= FAI= TT/SHBG FTZ= 24.00314 × TT/log 10 SHBG – 0.04599 × TT2 FTS, please see: Sodergard R, Backstrom T, Shanbhag V, Carstensen H. Calculation of free and bound fractions of testosterone and estradiol-17 beta to human plasm…

## Sheet: References
S1. Annerbo S, Wahlund LO and Lokk J. The significance of thyroid-stimulating hormone and homocysteine in the development of Alzheimer's disease in mild cognitive impairment: a 6-year follow-up study. American journal of Alzheimer's disease and other dementias. 2006; 21(3):182-188
S2. Annerbo S, Kivipelto M and Lokk J. A prospective study on the development of Alzheimer's disease with regard to thyroid-stimulating hormone and homocysteine. Dement Geriatr Cogn Disord. 2009; 28(3):275-280.
S3. Aubert CE, Bauer DC, da Costa BR, Feller M, Rieben C, Simonsick EM, Yaffe K, Rodondi N and Health ABCS. The association between subclinical thyroid dysfunction and dementia: The Health, Aging and Body Composition (Health ABC) Study. Clin Endocrinol (Oxf). 2017; 87(5):617-626
S4. Cappola AR, Arnold AM, Wulczyn K, Carlson M, Robbins J and Psaty BM. Thyroid function in the euthyroid range and adverse outcomes in older adults. J Clin Endocrinol Metab. 2015; 100(3):1088-1096.
S5. Castellano CA, Laurin D, Langlois MF, Fortier M, Tessier D, Gaudreau P, Ferland G, Payette H, Lorrain D and Cunnane SC. Thyroid function and cognition in the euthyroid elderly: a case-control study embedded in Quebec longitudinal study - NuAge. Psychoneuroendocrinology. 2013; 38(9):1772-1776.
S6. Chaker L, Wolters FJ, Bos D, Korevaar TI, Hofman A, van der Lugt A, Koudstaal PJ, Franco OH, Dehghan A, Vernooij MW, Peeters RP and Ikram MA. Thyroid function and the risk of dementia: The Rotterdam Study. Neurology. 2016; 87(16):1688-1695.
S7. de Jong FJ, den Heijer T, Visser TJ, de Rijke YB, Drexhage HA, Hofman A and Breteler MM. Thyroid hormones, dementia, and atrophy of the medial temporal lobe. J Clin Endocrinol Metab. 2006; 91(7):2569-2573.
S8. de Jong FJ, Masaki K, Chen H, Remaley AT, Breteler MM, Petrovitch H, White LR and Launer LJ. Thyroid function, the risk of dementia and neuropathologic changes: the Honolulu-Asia aging study. Neurobiol Aging. 2009; 30(4):600-606.
S9. Folkestad L, Brandt F, Lillevang-Johansen M, Brix TH and Hegedus L. Graves' disease and toxic nodular goiter, aggravated by duration of hyperthyroidism, are associated with Alzheimer's and vascular dementia. A register-based long-term follow-up of two large cohorts. Thyroid. 2020.
S10. Forti P, Olivelli V, Rietti E, Maltoni B, Pirazzoli G, Gatti R, Gioia MG and Ravaglia G. Serum thyroid-stimulating hormone as a predictor of cognitive impairment in an elderly cohort. Gerontology. 2012; 58(1):41-49.
S11.George KM, Lutsey PL, Selvin E, Palta P, Windham BG and Folsom AR. Association Between Thyroid Dysfunction and Incident Dementia in the Atherosclerosis Risk in Communities Neurocognitive Study. Journal of endocrinology and metabolism. 2019; 9(4):82-89.
S12. Hogervorst E, Huppert F, Matthews FE and Brayne C. Thyroid function and cognitive decline in the MRC Cognitive Function and Ageing Study. Psychoneuroendocrinology. 2008; 33(7):1013-1022.
S13. Kalmijn S, Mehta KM, Pols HA, Hofman A, Drexhage HA and Breteler MM. Subclinical hyperthyroidism and the risk of dementia. The Rotterdam study. Clin Endocrinol (Oxf). 2000; 53(6):733-737.
S14.Moon JH, Park YJ, Kim TH, Han JW, Choi SH, Lim S, Park DJ, Kim KW and Jang HC. Lower-but-normal serum TSH level is associated with the development or progression of cognitive impairment in elderly: Korean Longitudinal Study on Health and Aging (KLoSHA). J Clin Endocrinol Metab. 2014; 99(2):424-432.
S15. Quinlan P, Horvath A, Wallin A and Svensson J. Low serum concentration of free triiodothyronine (FT3) is associated with increased risk of Alzheimer's disease. Psychoneuroendocrinology. 2019; 99:112-119.
S16. Tan ZS, Beiser A, Vasan RS, Au R, Auerbach S, Kiel DP, Wolf PA and Seshadri S. Thyroid function and the risk of Alzheimer disease: the Framingham Study. Archives of internal medicine. 2008; 168(14):1514-1520.
S17. Vadiveloo T, Donnan PT, Cochrane L and Leese GP. The Thyroid Epidemiology, Audit, and Research Study (TEARS): morbidity in patients with endogenous subclinical hyperthyroidism. J Clin Endocrinol Metab. 2011; 96(5):1344-1351.
S18. Volpato S, Guralnik JM, Fried LP, Remaley AT, Cappola AR and Launer LJ. Serum thyroxine level and cognitive decline in euthyroid older women. Neurology. 2002; 58(7):1055-1061.
S19. Yeap BB, Alfonso H, Chubb SA, Puri G, Hankey GJ, Flicker L and Almeida OP. Higher free thyroxine levels predict increased incidence of dementia in older men: the Health in Men Study. J Clin Endocrinol Metab. 2012; 97(12):E2230-2237.
S20. Carcaillon L, Brailly-Tabard S, Ancelin ML, Tzourio C, Foubert-Samier A, Dartigues JF, Guiochon-Mantel A and Scarabin PY. Low testosterone and the risk of dementia in elderly men: Impact of age and education. Alzheimers Dement. 2014; 10(5 Suppl):S306-314.
S21. Carcaillon L, Brailly-Tabard S, Ancelin ML, Rouaud O, Dartigues JF, Guiochon-Mantel A and Scarabin PY. High plasma estradiol interacts with diabetes on risk of dementia in older postmenopausal women. Neurology. 2014; 82(6):504-511.
S22. Chu L-W, Tam S, Wong RLC, Yik P-Y, Song Y, Cheung BMY, Morley JE and Lam KSL. Bioavailable Testosterone Predicts a Lower Risk of Alzheimer's Disease in Older Men. Journal of Alzheimer's Disease. 2010; 21(4):1335-1345.
S23. Ford AH, Yeap BB, Flicker L, Hankey GJ, Chubb SAP, Golledge J and Almeida OP. Sex hormones and incident dementia in older men: The health in men study. Psychoneuroendocrinology. 2018; 98:139-147.
S24. Geerlings MI, Launer LJ, de Jong FH, Ruitenberg A, Stijnen T, van Swieten JC, Hofman A, Witteman JC, Pols HA and Breteler MM. Endogenous estradiol and risk of dementia in women and men: the Rotterdam Study. Ann Neurol. 2003; 53(5):607-615.
S25. Geerlings MI, Strozyk D, Masaki K, Remaley AT, Petrovitch H, Ross GW, White LR and Launer LJ. Endogenous sex hormones, cognitive decline, and future dementia in old men. Ann Neurol. 2006; 60(3):346-355.
S26. Hogervorst E, Matthews FE and Brayne C. Are optimal levels of testosterone associated with better cognitive function in healthy older women and men? Biochim Biophys Acta. 2010; 1800(10):1145-1152.
S27. Hsu B, Cumming RG, Waite LM, Blyth FM, Naganathan V, Le Couteur DG, Seibel MJ and Handelsman DJ. Longitudinal Relationships between Reproductive Hormones and Cognitive Decline in Older Men: The Concord Health and Ageing in Men Project. The Journal of Clinical Endocrinology & Metabolism. 2015; 100(6):2223-2230.
S28. Laughlin GA, Kritz-Silverstein D and Barrett-Connor E. Endogenous oestrogens predict 4-year decline in verbal fluency in postmenopausal women: the Rancho Bernardo Study. Clin Endocrinol (Oxf). 2010; 72(1):99-106.
S29. LeBlanc ES, Wang PY, Janowsky JS, Neiss MB, Fink HA, Yaffe K, Marshall LM, Lapidus JA, Stefanick ML, Orwoll ES and Osteoporotic Fractures in Men Research G. Association between sex steroids and cognition in elderly men. Clin Endocrinol (Oxf). 2010; 72(3):393-403.
S30. Moffat SD, Zonderman AB, Metter EJ, Kawas C, Blackman MR, Harman SM and Resnick SM. Free testosterone and risk for Alzheimer disease in older men. Neurology. 2004; 62(2):188-193.
S31. Muller M, van den Beld AW, Grobbee DE, de Jong FH and Lamberts SW. Sex hormones and cognitive decline in elderly men. Psychoneuroendocrinology. 2009; 34(1):27-31.
S32. Muller M, Schupf N, Manly JJ, Mayeux R and Luchsinger JA. Sex hormone binding globulin and incident Alzheimer's disease in elderly men and women. Neurobiol Aging. 2010; 31(10):1758-1765.
S33. Ponholzer A, Madersbacher S, Rauchenwald M, Jungwirth S, Fischer P and Tragl KH. Serum androgen levels and their association to depression and Alzheimer dementia in a cohort of 75-year-old men over 5 years: results of the VITA study. Int J Impot Res. 2009; 21(3):187-191.
S34. Ravaglia G, Forti P, Maioli F, Bastagli L, Montesi F, Pisacane N, Chiappelli M, Licastro F and Patterson C. Endogenous sex hormones as risk factors for dementia in elderly men and women. The journals of gerontology Series A, Biological sciences and medical sciences. 2007; 62(9):1035-1041.
S35. Suravarapu S, Bergstralh EJ, Farmer SA, Knopman DS, Jacobsen SJ and Roberts RO. Dementia and low testosterone and bioavailable testosterone levels in men: possible increased risk. Alzheimer disease and associated disorders. 2006; 20(3):138-140.
S36. Yaffe K, Lui L-Y, Grady D, Cauley J, Kramer J and Cummings SR. Cognitive decline in women in relation to non-protein-bound oestradiol concentrations. The Lancet. 2000; 356(9231):708-712.
S37. Yaffe K, Barnes D, Lindquist K, Cauley J, Simonsick EM, Penninx B, Satterfield S, Harris T, Cummings SR and Health ABCI. Endogenous sex hormone levels and risk of cognitive decline in an older biracial cohort. Neurobiol Aging. 2007; 28(2):171-178.
S38.Kalmijn S, Launer LJ, Stolk RP, de Jong FH, Pols HA, Hofman A, Breteler MM and Lamberts SW. A prospective study on cortisol, dehydroepiandrosterone sulfate, and cognitive function in the elderly. J Clin Endocrinol Metab. 1998; 83(10):3487-3492.
S39. Paulsen AJ, Schubert CR, Pinto A, Carlsson CM, Chappell RJ, Fischer ME, Klein BEK, Klein R, Tsai MY and Cruickshanks KJ. Neuroprotective Biomarkers and Cognitive Function in a Long-Term Prospective Population-based Study of Aging US Adults. Alzheimer disease and associated disorders. 2019:10.1097/WAD.0000000000000341.
S40. Schrijvers EM, Direk N, Koudstaal PJ, Kirschbaum C, Hofman A, Tiemeier H and Breteler MM. Associations of serum cortisol with cognitive function and dementia: the Rotterdam Study. J Alzheimers Dis. 2011; 25(4):671-677.
S41. Almeida OP, Hankey GJ, Yeap BB, Paul Chubb SA, Gollege J and Flicker L. Risk of prevalent and incident dementia associated with insulin-like growth factor and insulin-like growth factor-binding protein 3. Mol Psychiatry. 2018; 23(8):1825-1829.
S42. Dik MG, Pluijm SMF, Jonker C, Deeg DJH, Lomecky MZ and Lips P. Insulin-like growth factor I (IGF-I) and cognitive decline in older persons. Neurobiology of Aging. 2003; 24(4):573-581.
S43. Green CJ, Holly JM, Bayer A, Fish M, Ebrahim S, Gallacher J and Ben-Shlomo Y. The role of IGF-I, IGF-II, and IGFBP-3 in male cognitive aging and dementia risk: the Caerphilly Prospective Study. J Alzheimers Dis. 2014; 41(3):867-875.
S44. Kalmijn S, Janssen JA, Pols HA, Lamberts SW and Breteler MM. A prospective study on circulating insulin-like growth factor I (IGF-I), IGF-binding proteins, and cognitive function in the elderly. J Clin Endocrinol Metab. 2000; 85(12):4551-4555.
S45. McGrath ER, Himali JJX, 2019 #50}, Levy D, Conner SC, DeCarli CS, Pase MP, Courchesne P, Satizabal CL, Vasan RS, Beiser AS and Seshadri S. Circulating IGFBP-2: a novel biomarker for incident dementia. Ann Clin Transl Neurol. 2019; 6(9):1659-1670.
S46. Quinlan P, Horvath A, Nordlund A, Wallin A and Svensson J. Low serum insulin-like growth factor-I (IGF-I) level is associated with increased risk of vascular dementia. Psychoneuroendocrinology. 2017; 86:169-175.
S47. Westwood AJ, Beiser A, Decarli C, Harris TB, Chen TC, He XM, Roubenoff R, Pikula A, Au R, Braverman LE, Wolf PA, Vasan RS and Seshadri S. Insulin-like growth factor-1 and risk of Alzheimer dementia and brain atrophy. Neurology. 2014; 82(18):1613-1619.
S48.Zhang WB, Aleksic S, Gao T, Weiss EF, Demetriou E, Verghese J, Holtzer R, Barzilai N and Milman S. Insulin-like Growth Factor-1 and IGF Binding Proteins Predict All-Cause Mortality and Morbidity in Older Adults. Cells. 2020; 9(6).
